# Supplementary material
Source: Springer Nature journal article supplement (https://www.springermedizin.de/resource/supplementary/12881_2008_422_MOESM5_ESM.pdf/9450774)

**A**

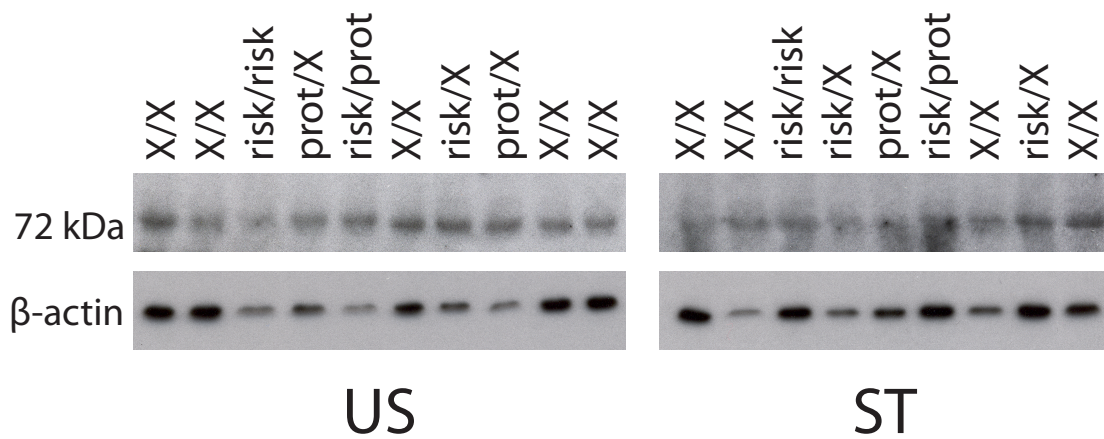

**B**

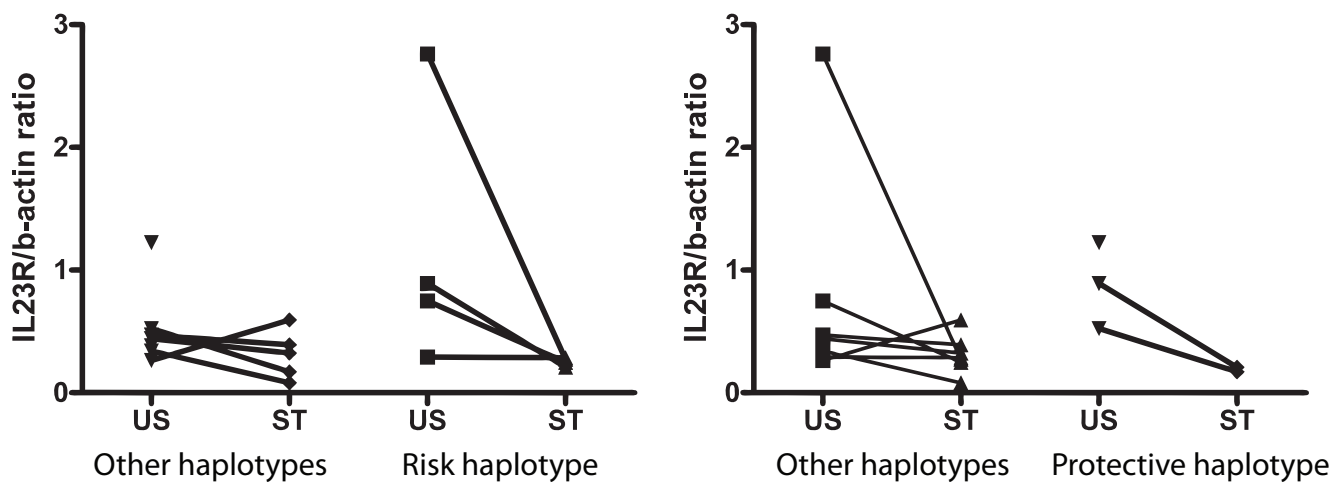

Supplement: MOESM5 [file 9450774]
